# Supplementary material for: Analysis and validation of diagnostic biomarkers and immune cell infiltration characteristics in pediatric sepsis by integrating bioinformatics and machine learning
Source: PubMed Central journal article supplement (PMC10533616; doi:10.1007/s12519-023-00717-7), 2023-04-28
Supplement: 12519_2023_717_MOESM1_ESM.pdf [file 12519_2023_717_MOESM1_ESM.pdf]

Supplementary Table 1. Information on microarray datasets obtained from GEO

| GEO dataset | Platform | pediatric sepsis | Normal |
|-------------|----------|------------------|--------|
| GSE26378    | GPL570   | 72               | 21     |
| GSE26440    | GPL570   | 98               | 32     |
| GSE13904    | GPL570   | 106              | 18     |

*GEO* Gene Expression Omnibus

Supplementary Table 2. The clinical characteristics of the two groups of patients

| Characteristics      | Pediatrics sepsis | Normal        |
|----------------------|-------------------|---------------|
| Number               | 170               | 53            |
| Age (Years)          | 2.3 (0.9-6.1)     | 2.2 (0.7-4.8) |
| Number of deaths (%) | 29 (17.1)         | 0 (0)         |

Supplementary Table 3. GO enrichment analysis of DEGs

| Ontology | Term       | Description                                  |
|----------|------------|----------------------------------------------|
| BP       | GO:0002764 | immune response-regulating signaling pathway |
| BP       | GO:0002253 | activation of immune response                |
| BP       | GO:0001819 | positive regulation of cytokine production   |
| BP       | GO:0002443 | leukocyte mediated immunity                  |
| BP       | GO:0042110 | T cell activation                            |
| BP       | GO:0002274 | myeloid leukocyte activation                 |
| CC       | GO:0070820 | tertiary granule                             |
| CC       | GO:0042581 | specific granule                             |
| CC       | GO:0034774 | secretory granule lumen                      |
| CC       | GO:0060205 | cytoplasmic vesicle lumen                    |
| CC       | GO:0031983 | vesicle lumen                                |
| CC       | GO:0035580 | specific granule lumen                       |
| MF       | GO:0140375 | immune receptor activity                     |
| MF       | GO:0023023 | MHC protein complex binding                  |
| MF       | GO:0030246 | carbohydrate binding                         |

|    |            |                                        |
|----|------------|----------------------------------------|
| MF | GO:0004896 | cytokine receptor activity             |
| MF | GO:0023026 | MHC class II protein complex binding   |
| MF | GO:0003953 | NAD <sup>+</sup> nucleosidase activity |

---

*DEGs* differentially expressed genes, *GO* gene ontology, *BP* biological pathways, *CC* cellular components, *MF* molecular functions, *MHC* major histocompatibility complex, *NAD* nicotinamide adenine dinucleotide.

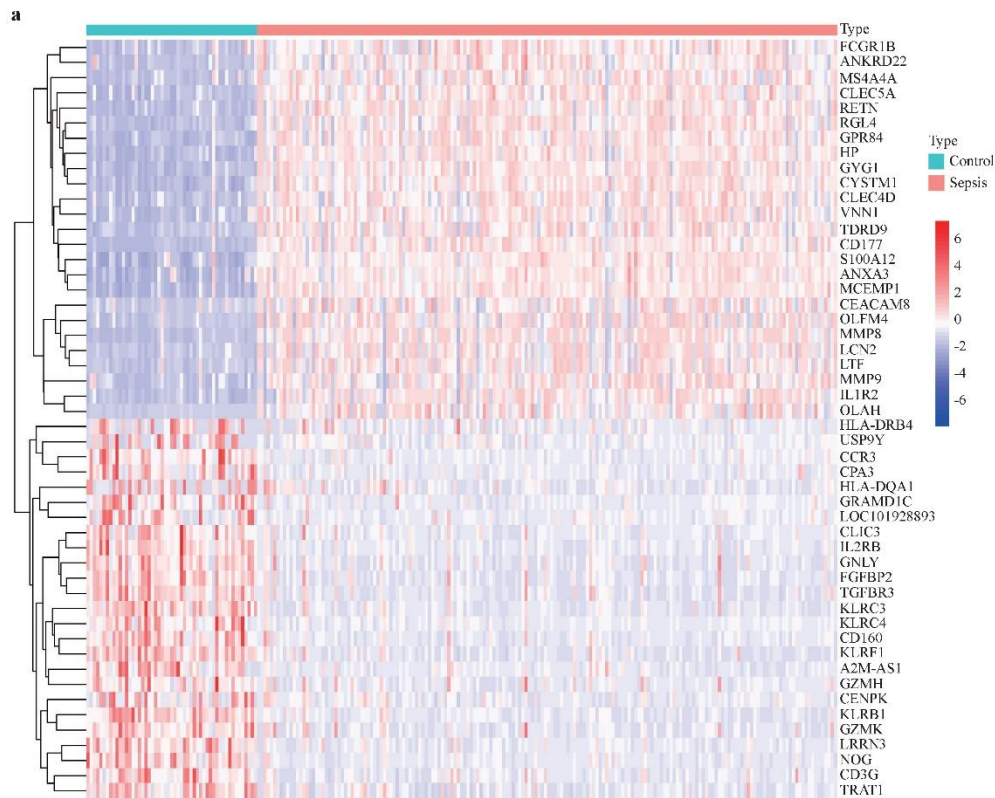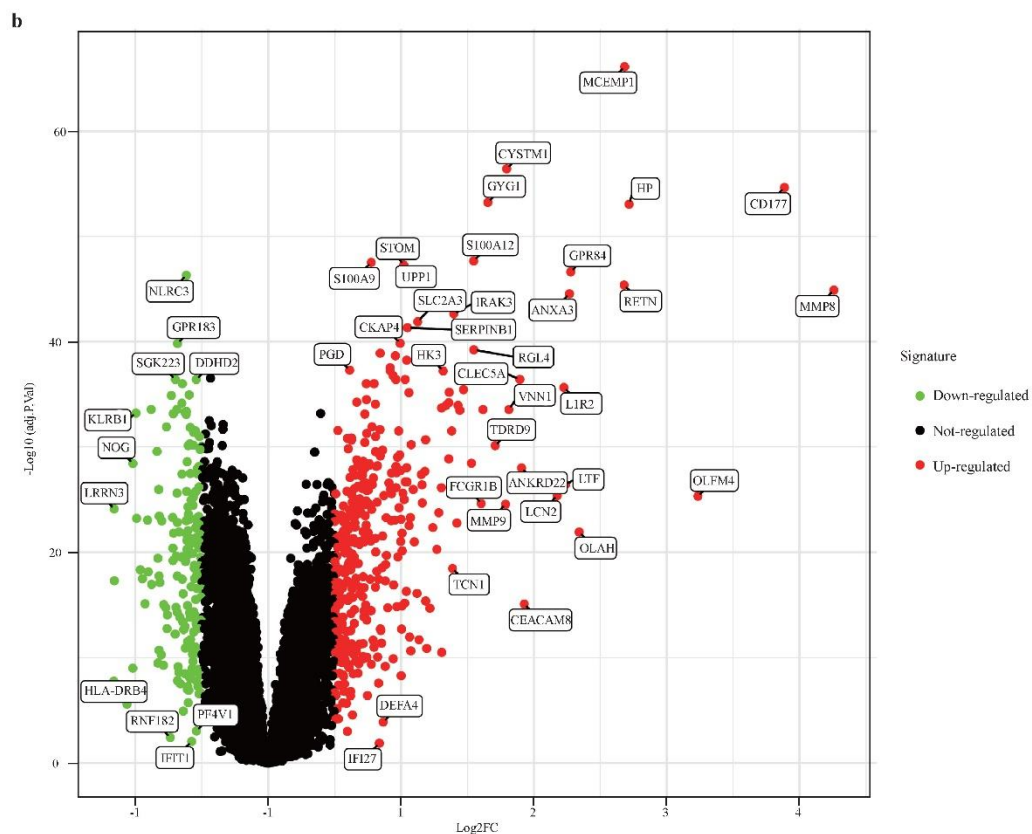

Supplementary Fig. 1. Detection of differentially expressed genes from datasets on paediatric sepsis.

(a) A heatmap comparing the genes that are differentially expressed in paediatric sepsis patients and control patients; (b) Volcano plot of the 556 DEGs. *DEGs* differentially expressed genes, *FC* fold-change.

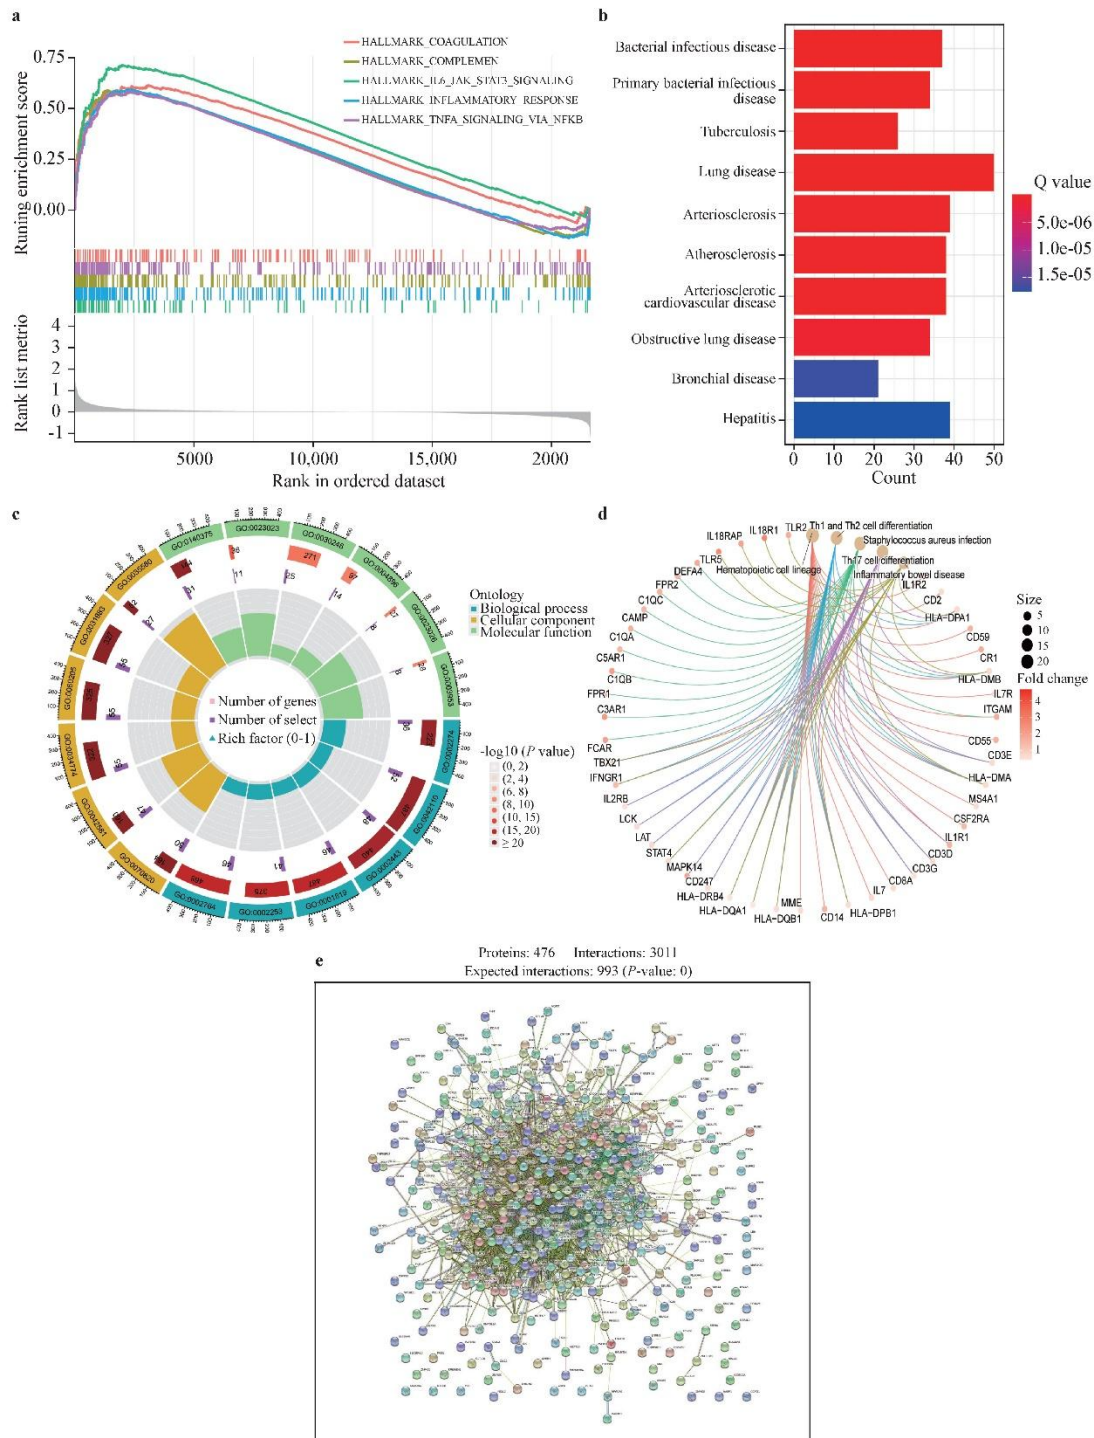

Supplementary Fig. 2. Functional analysis of DEGs. (a) GSEA analysis; (b) DO analysis; (c) GO enrichment analysis; (d) KEGG pathway enrichment analysis; (e) PPI networks. *DEGs* differentially expressed genes, *GSEA* gene set enrichment analysis, *DO* disease ontology, *GO* gene ontology, *KEGG* kyoto encyclopedia of genes and genomes, *PPI* Protein–protein interaction.

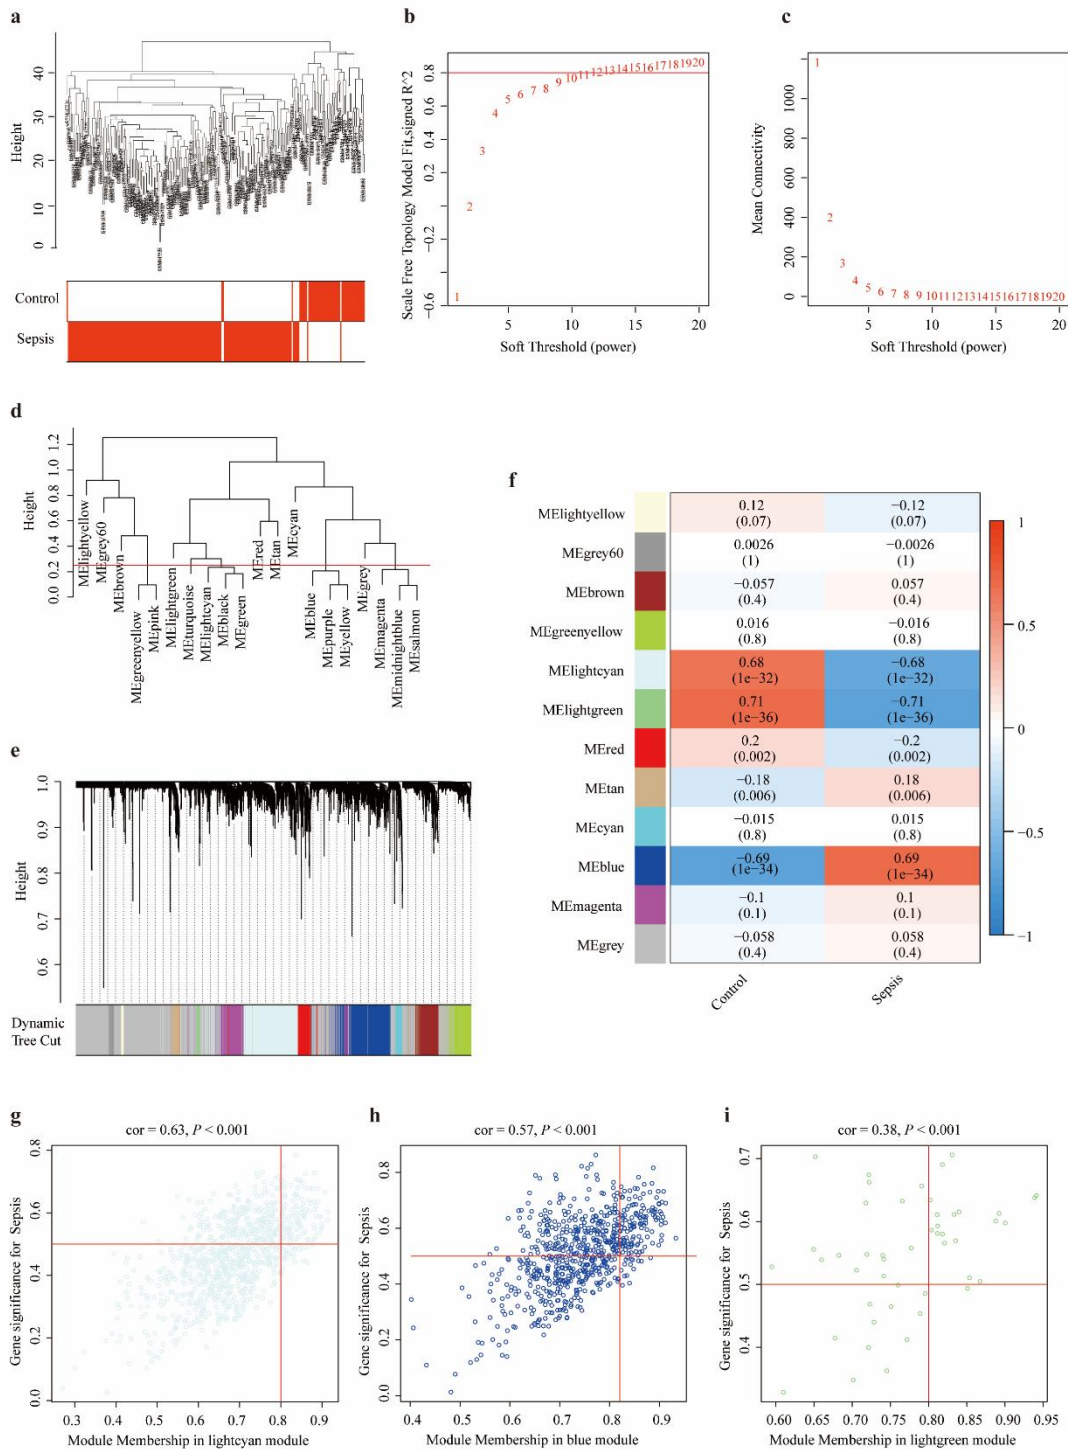

Supplementary Fig. 3. Weighted co-expression network related datasets construction in paediatric sepsis. (a) Clustering dendrogram of 223 samples; (b, c) Analysis of network topology for various soft thresholds ( $\beta$ ); (d) Clustering dendrogram of genes; (e) Gene dendrograms obtained by average linkage hierarchical clustering; (f) Module-trait relationships; (g) A scatterplot of GS for recurrence vs. MM in the lightcyan module; (h) A scatterplot of GS for recurrence vs. MM in the blue module; (i) A scatterplot of GS for recurrence vs. MM in the lightgreen module. *GS* gene significance, *MM* module membership.

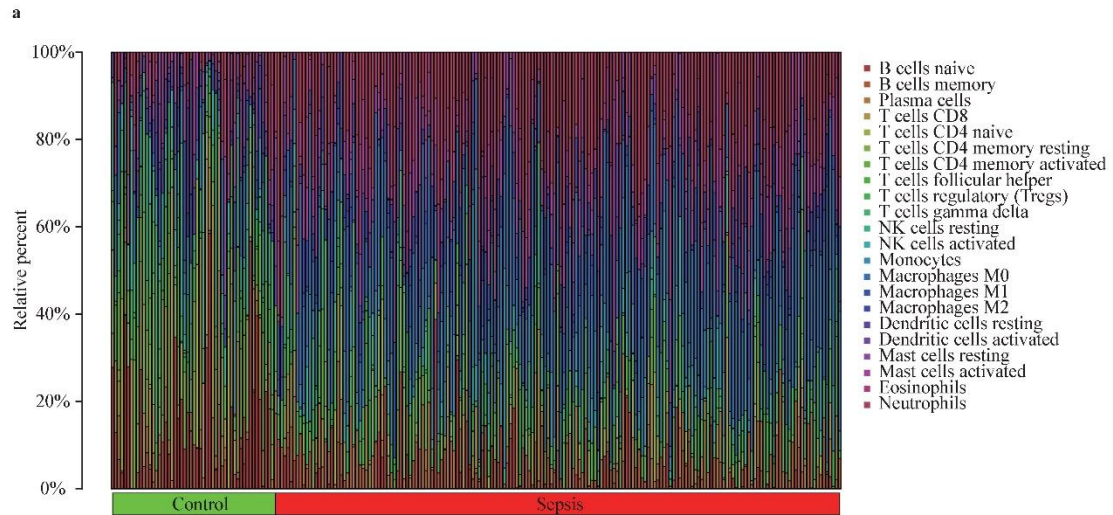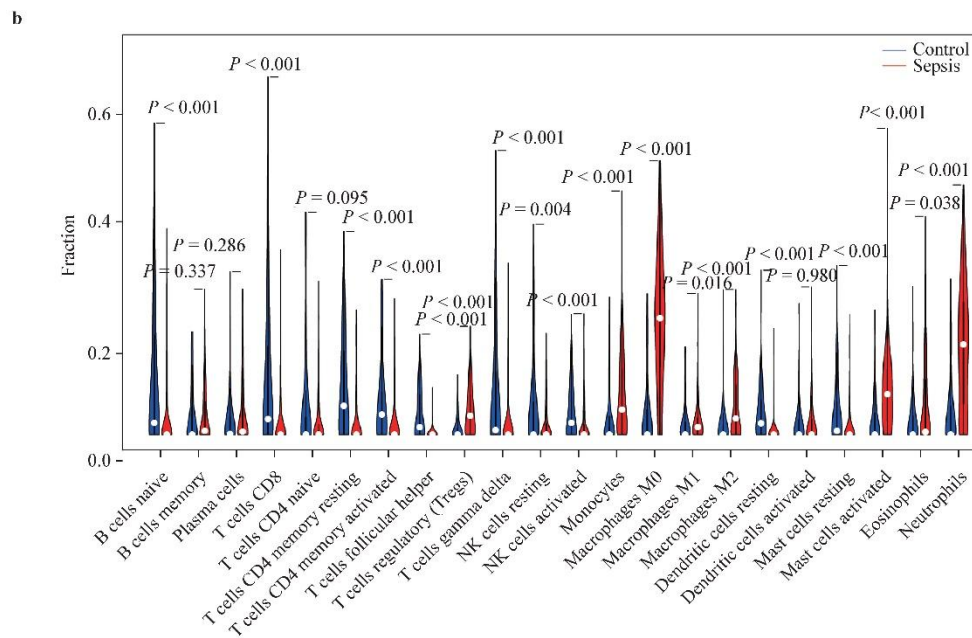

Supplementary Fig. 4. Evaluation and visualization of immune cell infiltration. (a) Boxplot and (b) Violin diagram of the proportion of 22 types of immune cells. *NK* natural killer.

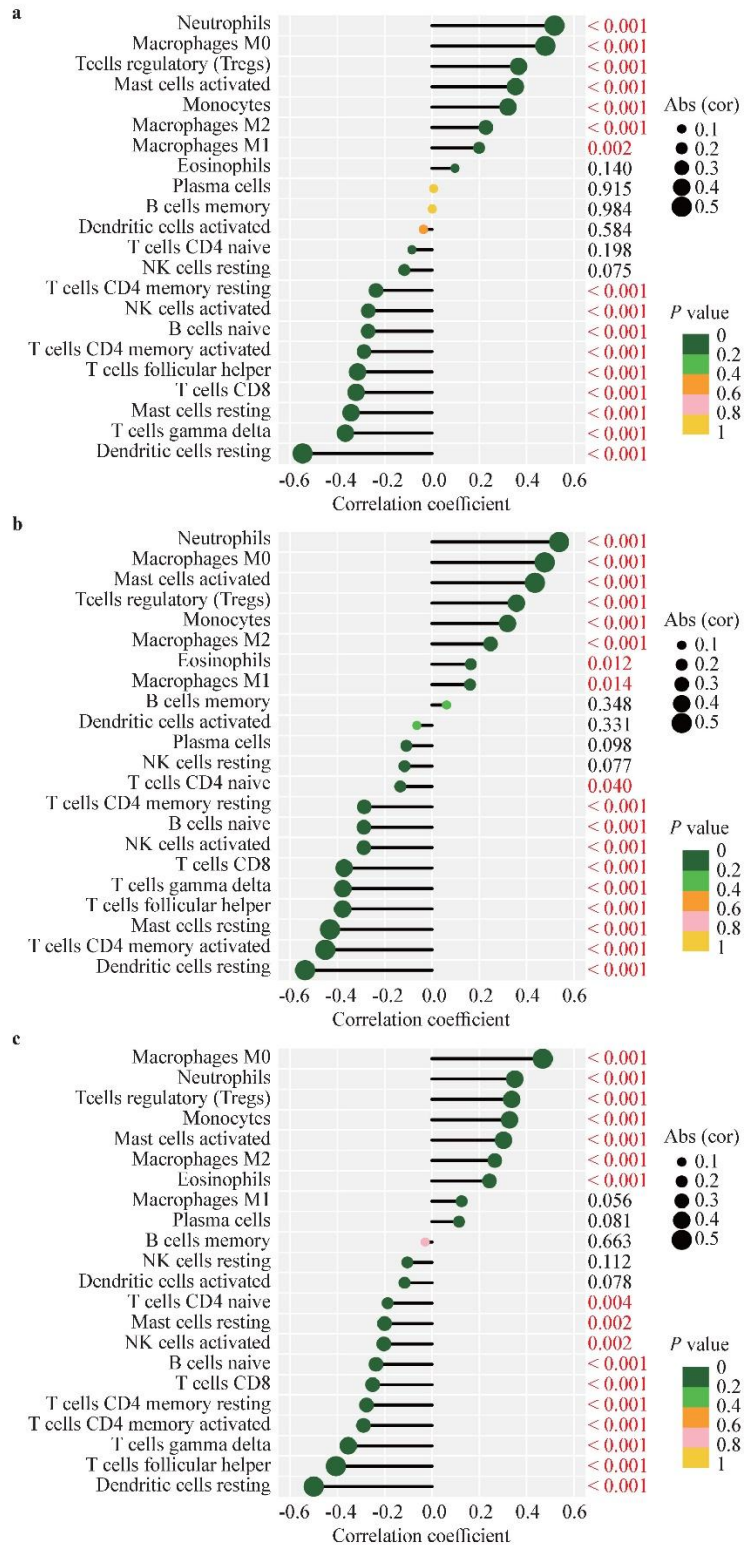

Supplementary Fig. 5. There is a correlation between hub genes and immune cells that have infiltrated the tissue. (a) Correlation between CYSTM1 and infiltrating immune cells; (b) Correlation between MMP8 and infiltrating immune cells; (c) Correlation between CD177 and infiltrating immune cells. *NK* natural killer.
